# Supplementary material for: [(η5-C5H5)Fe(CO)2]2B(2,4,6-Me3C6H2): synthesis, spectroscopic and structural characterization of a transition metal complex containing an unsupported bridging borylene ligand
Source: Royal Society of Chemistry journal article supplement (doi:10.1039/b201415g), 2002-03-20
Supplement: b201415g.doc [file b201415g.doc]

Supplementary Material (ESI) for Chemical Communications

This journal is © The Royal Society of Chemistry 2002

Correspondence and proofs to: Dr Simon Aldridge

at address below

AldridgeS@cardiff.ac.uk

Tel: (029) 20875495

Fax: (029) 20874030

**[(5-C5H5)Fe(CO)2]2B(2,4,6-Me3C6H2): synthesis, spectroscopic and structural characterization of a transition metal complex containing an unsupported bridging borylene ligand.**

Simon Aldridge,* Deborah L. Coombs and Cameron Jones.

Department of Chemistry, Cardiff University, PO Box 912, Park Place, Cardiff, UK CF10 3TB.

# Supplementary material

**Spectroscopic data for (5-C5H4Me)Fe(CO)2B(2,4,6-Me3C6H2)Br, 2'**

MS(EI): *M*+ = 400 (weak), fragment ion peaks at *m/z* 372 [(M-CO)+, 30 %] and 344 [(M-2CO)+, 70 %]. 1H NMR ([2H6]benzene, 21oC),  1.32 [s, 3H, 5-C5H4C*H*3],2.20 [s, 9H, *ortho*- and *para*-CH3 of mesityl], 3.97 [s, 4H, all four CHs of 5-C5*H*4CH3], 6.70 [s, 2H, aromatic CH]. 13C NMR ([2H6]benzene, 21oC), 12.4 [5-C5H4*C*H3],20.9 [*para*-*C*H3 of mesityl], 21.2 [*ortho*-*C*H3 of mesityl], 86.7, 86.9 [*C*H of 5-C5H4CH3], 104.2 [5-C5H4CH3 quaternary], 131.2 [aromatic CH], 129.9, 136.5 [aromatic quaternary],214.3 [CO]. 11B NMR ([2H6]benzene, 21oC),  111.3. IR (KBr disk, cm-1) (CO) 2009 s, 1961 s.
